# Supplementary material
Source: PubMed Central journal article supplement (PMC2699919)
Supplement: hesr0044-1010-SD2.pdf [file hesr0044-1010-SD2.pdf]

**4.A. Author matrix.** Please complete the authorship matrix affirming which roles each author has fulfilled. To be listed as an author, persons should have made contributions in both of the shaded areas; all others should be acknowledged as contributors. In the box in 4.B., we invite you to name other contributors. In addition, you may use the box in 4.B. if you wish to name other kinds of contributions by authors.

Section 4 A. and B. will be made available in the electronic version of accepted manuscripts.

\*You may wish to copy the author's names from the box on page 2.

| Manuscript Number:         | Each author must check at least one blue box showing important contributions to: |                                                  |                                     | & check contributions in at least one orange box: |                                                      |
|----------------------------|----------------------------------------------------------------------------------|--------------------------------------------------|-------------------------------------|---------------------------------------------------|------------------------------------------------------|
|                            | Conception and design                                                            | Acquisition of data (arranging for or obtaining) | Analysis and interpretation of data | Drafting the manuscript                           | Critical revision for important intellectual content |
| Name of Each Author*       |                                                                                  |                                                  |                                     |                                                   |                                                      |
| Christine E. Bishop, Ph.D. | <input checked="" type="checkbox"/>                                              | <input type="checkbox"/>                         | <input checked="" type="checkbox"/> | <input checked="" type="checkbox"/>               | <input checked="" type="checkbox"/>                  |
| Andrew M. Ryan, Ph.D.      | <input type="checkbox"/>                                                         | <input type="checkbox"/>                         | <input checked="" type="checkbox"/> | <input checked="" type="checkbox"/>               | <input checked="" type="checkbox"/>                  |
| Daniel M. Gilden, M.S      | <input type="checkbox"/>                                                         | <input checked="" type="checkbox"/>              | <input checked="" type="checkbox"/> | <input type="checkbox"/>                          | <input checked="" type="checkbox"/>                  |
| Joanna Kubisiak, MPH       | <input type="checkbox"/>                                                         | <input checked="" type="checkbox"/>              | <input type="checkbox"/>            | <input type="checkbox"/>                          | <input checked="" type="checkbox"/>                  |
| Cindy Parks Thomas, Ph.D.  | <input checked="" type="checkbox"/>                                              | <input checked="" type="checkbox"/>              | <input checked="" type="checkbox"/> | <input checked="" type="checkbox"/>               | <input checked="" type="checkbox"/>                  |

#### **Section 4.B. Other Contributions**

Some research projects involve very extensive teams with many people who do not meet the criteria for authorship but who have contributed importantly to the work. The box below is designed to acknowledge other types of contributions. As appropriate, use this box to name other people who have made important contributions to the work reported in this manuscript. You may choose to also name authors as contributing in these areas.

Please name contributors to be acknowledged for:  
Statistical analysis:

Data collection (under supervision)

Interviewing (under supervision)

Programming and data management: Melissa Morley, PhD

Editing for presentation or style

Obtaining funding

Administrative, technical, or material support

Supervision of research staff

Other: (specify \_\_\_\_\_ )

**INSTRUCTIONS: THE CORRESPONDING AUTHOR MUST FILL OUT SECTION 5.**

**5. Joint Acknowledgment/Disclosure Statement.** Please enter a 1-3 paragraph statement that acknowledges all forms of financial and material support for the project, the roles of key individuals who should be recognized; (this may or may not extend to everyone listed as contributors.) Please also include summary statements about what you feel are the conflicts of interests and disclosures without which some readers may feel that important relevant information is being withheld. The editors will determine whether these disclosures are sufficient or excessive and may return a revised version. All authors will need to approve the final version.

Section 5 will be made available in both the electronic and print version of accepted manuscripts.

**Joint Acknowledgement/Disclosure Statement:** Acknowledgments: The authors gratefully acknowledge the support of the Health Care Financing and Organization (HCFO) initiative of the Robert Wood Johnson Foundation, through the project "The Role of Benefit Design in Enrollment, Drug Use, and Expenditures," Deborah Rogal (Project Officer) and Cindy Parks Thomas (Principal Investigator); and, for support for data development, the Centers for Medicare and Medicaid Services project, "Evaluation of the Impact of Pharmacy Plus Waivers in Illinois and Wisconsin on Medicare and Medicaid" (CMS 500-00-0031/TO2), William Clark (Project Officer), Donald Shepard (Principal Investigator). Andrew Ryan has been supported by a training grant from Agency for Health Care Research and Quality (grant number 05 T32 HS000062-14) and by the Jewish Healthcare Foundation under the grant "Achieving System-wide Quality Improvements - A collaboration of the Jewish Healthcare Foundation and Schneider Institutes for Health Policy." Staff of the Illinois Department of Public Aid provided information concerning the ElderCare plan and supported access to data. Melissa Morley assisted with preparation of the data and preliminary analyses.

**Disclosures:** none

**Disclaimers:** none

**The corresponding author should obtain permission to name all individuals named in an Acknowledgment or the Contributorship Section because readers may infer their endorsement of data and conclusions.**

**The corresponding author must check the box below to affirm his/her certification that:**

- all persons who have made substantial contributions to the work reported in this manuscript (e.g., data collection, analysis, or writing or editing assistance) but who do not fulfill the authorship criteria are named with their specific contributions in the Contributorship Box associated with the manuscript.
- all persons named in the Contributorship box have provided me with permission

to be named.

- no other persons have made substantial contributions to this manuscript.
- all authors have approved the Joint Acknowledgement/Disclosure Statement intended for publication and the author matrix.

I, the corresponding author, certify that the above statements are true.

(Adapted, with permission, from the Journal of the American Medical Association, 2006)
